# Supplementary material for: Enhancing the catalytic performance of Co–N–C derived from ZIF-67 by mesoporous silica encapsulation for chemoselective hydrogenation of furfural
Source: Royal Society of Chemistry journal article supplement (doi:10.1039/d2nr05831f), 2023-01-01
Supplement: d2nr05831f1.pdf [file d2nr05831f1.pdf]

## Supplementary Information

### **Boosting catalytic performance of Co-N-C derived from ZIF-67 by mesoporous silica encapsulation for chemoselective hydrogenation of furfural**

Jianbo Zhao,<sup>1,\*</sup> Xiaomeng Li,<sup>1</sup> Meng Zhang,<sup>1</sup> Zhuo Xu,<sup>1</sup> Xiaomei Qin,<sup>1</sup> Yingfan Liu,<sup>1</sup>  
Lifeng Han,<sup>2</sup> Gao Li<sup>3,\*</sup>

<sup>1</sup> School of Material and Chemical Engineering, Zhengzhou University of Light Industry, Zhengzhou 450001, P. R. China

<sup>2</sup> Henan Provincial Key Laboratory of Surface and Interface Science, Zhengzhou University of Light Industry, Zhengzhou 450001, P. R. China

<sup>3</sup> State Key Laboratory of Catalysis, Dalian Institute of Chemical Physics, Chinese Academy of Sciences, Dalian 116023, P. R. China

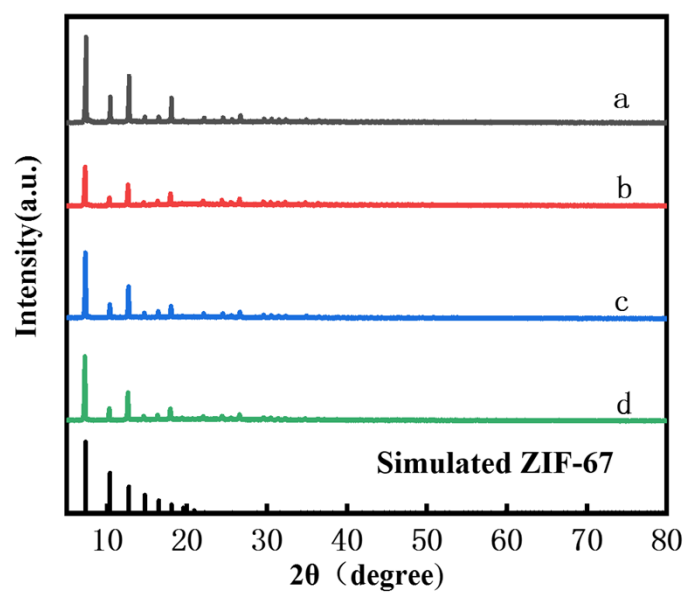

**Fig. S1.** XRD patterns of ZIF-67 and ZIF-67@SiO<sub>2</sub>: (a) ZIF-67, (b) ZIF-67@SiO<sub>2</sub>-20, (c) ZIF-67@SiO<sub>2</sub>-50, (d) ZIF-67@SiO<sub>2</sub>-100.

Figure S1 showed the peaks at 7.5°, 10.6°, 12.9° and 18.3°, in good agreement with the simulated characteristic peaks of ZIF-67, showing the successful formation of ZIF-67. The XRD pattern of ZIF-67@SiO<sub>2</sub> showed the typical peaks of pure ZIF-67, suggesting that the crystallinity of ZIF-67 was maintained after the coating of silica from hydrolysis of TEOS.

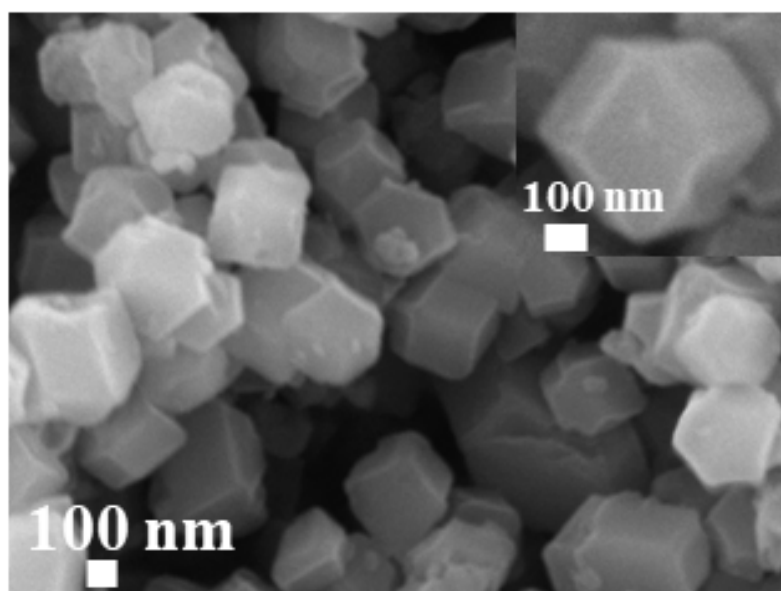

**Fig. S2.** SEM image of ZIF-67.

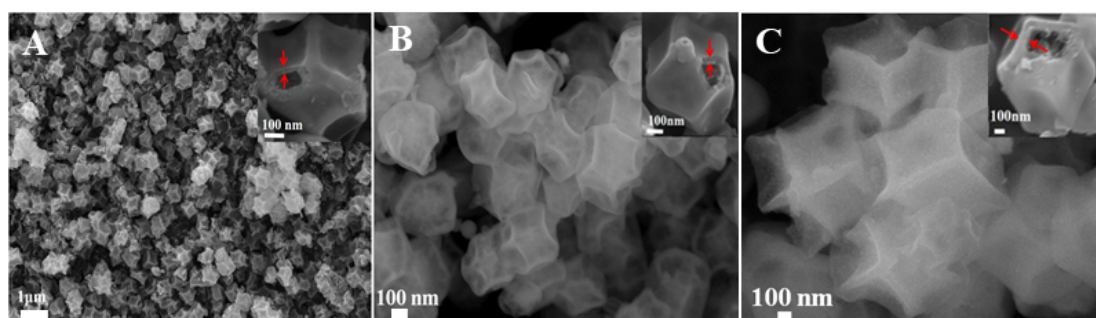

**Fig. S3.** SEM images: (A) Co-N-C@mSiO<sub>2</sub>-20-600, (B) Co-N-C@mSiO<sub>2</sub>-50-600, and (C) Co-N-C@mSiO<sub>2</sub>-100-600.

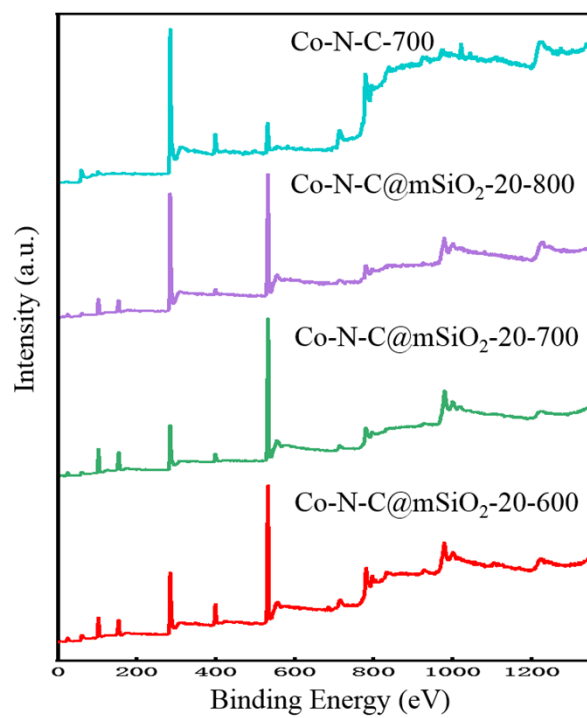

**Fig. S4.** Full XPS survey spectra of samples.

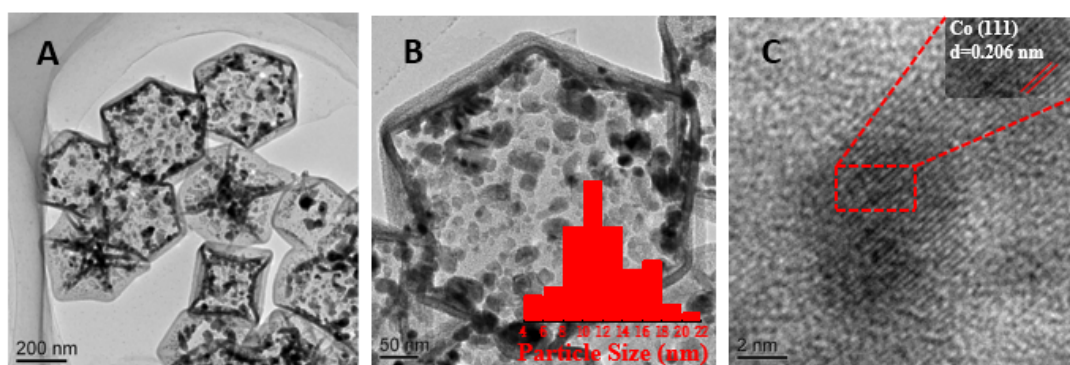

**Fig. S5.** Co@mSiO<sub>2</sub>-20: (A,B) TEM images and (C) HRTEM image.

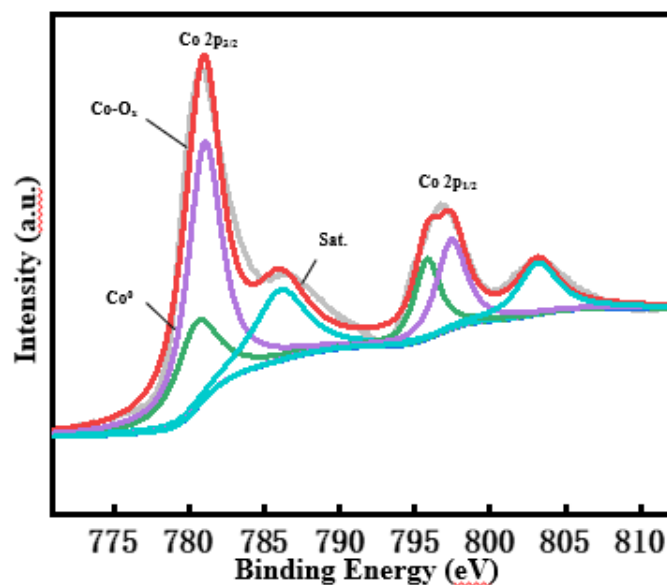

**Fig. S6.** Co 2p XPS spectra of Co@mSiO<sub>2</sub>-20. The deconvoluted peaks in Co 2p spectra were ascribed to metallic Co<sup>0</sup>, Co-O<sub>x</sub>, and satellite peak, respectively. No Co-N<sub>x</sub> species was found.

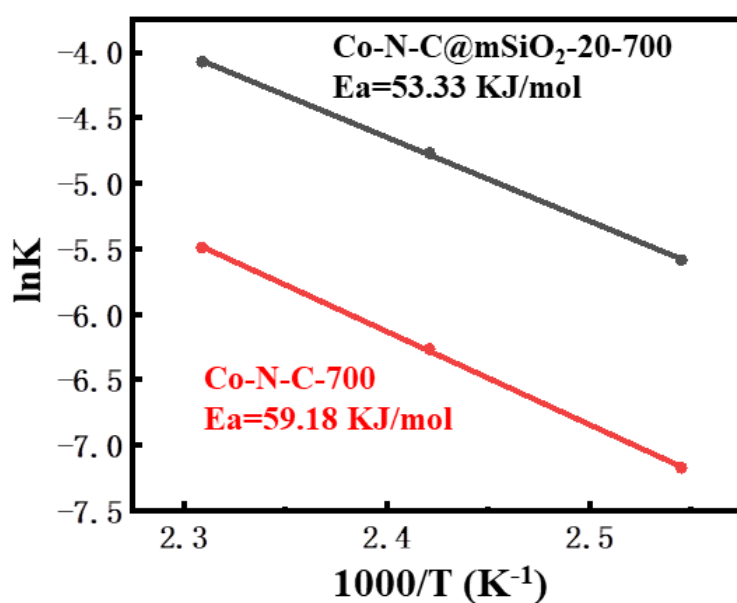

**Fig. S7.** Arrhenius plots for furfural hydrogenation over CoN<sub>x</sub>-C@mSiO<sub>2</sub>-20-700 and Co@N-C-700 catalysts. Other reaction conditions: furfural, 1 mmol; 2-Propanol, 3 mL; catalyst, 0.005 g; stirring speed, 500 rpm.

## Spent catalysts

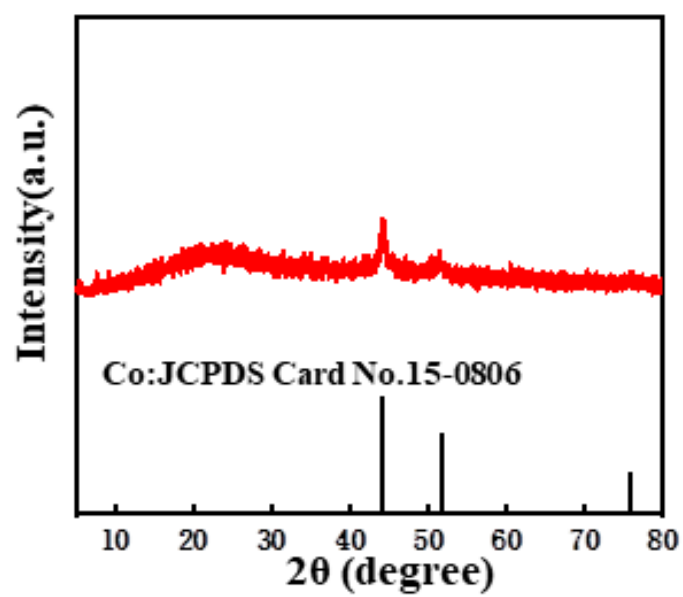

**Fig. S8.** XRD patterns of spent  $\text{CoN}_x\text{-C@mSiO}_2\text{-20-700}$ .

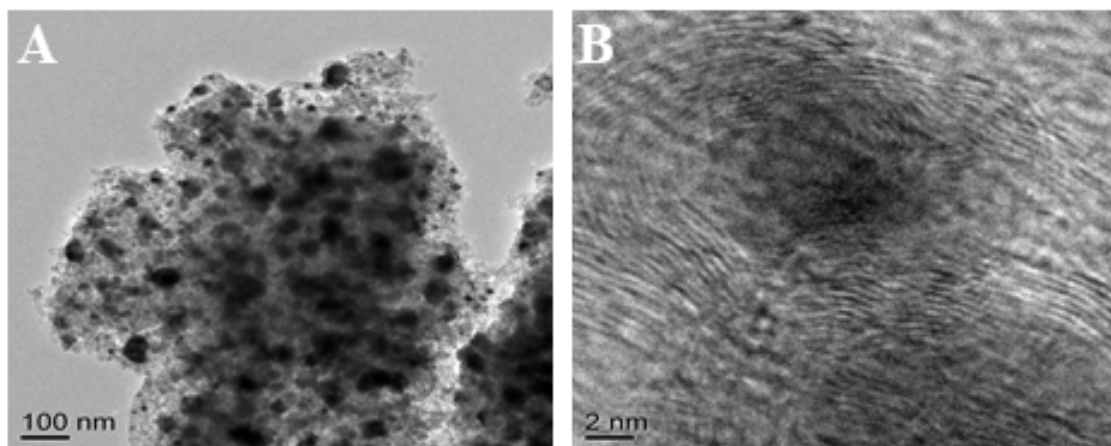

**Fig. S9.** TEM images of spent  $\text{CoN}_x\text{-C@mSiO}_2\text{-20-700}$ .

**Table S1.** The Co valence and content of Co catalysts were determined by XPS.

| Catalysts                        | Co <sup>0</sup> (%) | Co-O <sub>x</sub> (%) | Co-N <sub>x</sub> (%) |
|----------------------------------|---------------------|-----------------------|-----------------------|
| Co@N-C-700                       | 42.6                | 34.1                  | 23.3                  |
| Co-N-C@mSiO <sub>2</sub> -20-600 | 38.9                | 37.1                  | 24.0                  |
| Co-N-C@mSiO <sub>2</sub> -20-700 | 27.2                | 41.8                  | 31.0                  |
| Co-N-C@mSiO <sub>2</sub> -20-800 | 32.8                | 39.4                  | 27.8                  |

**Table S2.** The specific surface area and pore volume of Co catalysts were determined by BET.

| Catalysts                        | BET Surface Area<br>(cm <sup>2</sup> /g) | Pore Volume<br>(cm <sup>3</sup> /g) | pore size (nm) |
|----------------------------------|------------------------------------------|-------------------------------------|----------------|
| Co@N-C-700                       | 174.2                                    | 0.15                                | 3.83           |
| Co-N-C@mSiO <sub>2</sub> -20-600 | 207.2                                    | 0.35                                | 3.88           |
| Co-N-C@mSiO <sub>2</sub> -20-700 | 296.2                                    | 0.37                                | 3.94           |
| Co-N-C@mSiO <sub>2</sub> -20-800 | 291.9                                    | 0.35                                | 3.90           |

**Table S3.** Comparison of catalytic performance over non-precious metal catalysts in the hydrogenation of furfural to furfuryl alcohol.

| Entry | Catalyst                                          | T/<br>°C | P <sub>H2</sub><br>/MPa | Solvent    | Con.<br>/% | Sel.<br>/% | TO<br>F<br>/h <sup>-1</sup> | Ref.         |
|-------|---------------------------------------------------|----------|-------------------------|------------|------------|------------|-----------------------------|--------------|
| 1     | Co/SBA-15                                         | 150      | 2                       | ethanol    | 92         | 96         | 1.0                         | [1]          |
| 2     | Cu-Co/SBA-15                                      | 170      | 2                       | 2-propanol | 99         | 80         | 7.6                         | [2]          |
| 3     | Co/NC-400-6                                       | 180      | 2                       | 2-propanol | 99         | 22         | ---                         | [3]          |
| 4     | NiCoZn@NC-600                                     | 160      | 2                       | THF        | 86         | >99        | ---                         | [4]          |
| 5     | CuCo <sub>0.4</sub> /C-873                        | 140      | 3                       | ethanol    | 99         | 98         | --                          | [5]          |
| 6     | 2%Ni-5%Cu/SiO <sub>2</sub>                        | 100      | 2                       | methanol   | 94         | 64         | 1.3                         | [6]          |
| 7     | Cu-Cr                                             | 110      | 1                       | 2-propanol | 48         | 100        | 1.3                         | [7]          |
| 8     | CuNi/MgAlO                                        | 100      | 4                       | methanol   | 99         | 99         | 15                          | [8]          |
| 9     | Ni <sub>3</sub> Fe <sub>1</sub> /SiO <sub>2</sub> | 140      | 3.4                     | methanol   | 100        | 96         | 49                          | [9]          |
| 10    | Co-N-C@mSiO <sub>2</sub> -20-700                  | 140      | 1                       | 2-propanol | 95         | 89         | 13                          | This<br>work |



**Table S4.** TOFs of metal Co and CoN<sub>x</sub> active sites.

| Catalysts                        | d <sub>TEM</sub> <sup>a</sup> /nm | Con. <sup>b</sup> /% | TOF <sup>c</sup> /h <sup>-</sup> | X <sub>CoN<sub>x</sub></sub> <sup>d</sup> /% | TOF <sub>Co</sub> /h <sup>-</sup> | TOF <sub>Co-N<sub>x</sub></sub> /h <sup>-</sup> |
|----------------------------------|-----------------------------------|----------------------|----------------------------------|----------------------------------------------|-----------------------------------|-------------------------------------------------|
|                                  |                                   |                      | 1                                |                                              | 1                                 | 1                                               |
| Co@SiO <sub>2</sub>              | 11.3                              | 2.3                  | 1.2                              | -                                            | 1.2                               | --                                              |
| Co-N-C@mSiO <sub>2</sub> -20-700 | 9.0                               | 20.5                 | 12.9                             | 31.0                                         | 1.2                               | 39                                              |

<sup>a</sup> Co particle size was determined by TEM. <sup>b</sup> Conversion of furfural (Con.) was tested by GC. <sup>c</sup> Conversion of furfural was tested by GC. <sup>d</sup>X<sub>CoN<sub>x</sub></sub> was the proportion of CoN<sub>x</sub> calculated by XPS.

Here TOF<sub>CoNP</sub> of metal Co was assumed to be equal for Co@SiO<sub>2</sub> and CoN<sub>x</sub>-C@mSiO<sub>2</sub>-20-700. The TOF of Co-N-C@mSiO<sub>2</sub>-20-700 was defined as the total activity of metal Co and Co-N<sub>x</sub> species. The TOF of Co-N<sub>x</sub> species was obtained as follows:

$$\text{TOF}_{\text{CoN}_x} = \frac{\text{TOF} - \text{TOF}_{\text{CoNP}} \times (1 - X_{\text{CoN}_x})}{X_{\text{CoN}_x}}$$

## Reference

- [1] M. Audemar, C. Ciotonea, K.D. Vigier, S. Royer, A. Ungureanu, B. Dragoi, E. Dumitriu and F. Jerome, *ChemSusChem*, 2015, **8**, 1885-1891.
- [2] S. Srivastava, P. Mohanty, J.K. Parikh, A.K. Dalai, S.S. Amritphale and A.K. Khare, *Chinese. J. Catal.*, 2015, **36**, 933-942.
- [3] J.G. Lee, S. Yoon, E. Yang, J.H. Lee, K. Song, H.R. Moon and K. An, *J. Catal.*, 2020, **392**, 302-312.
- [4] S.J. Li, Y.F. Fan, C.H. Wu, C.F. Zhuang, Y. Wang, X.M. Li, J. Zhao and Z.F. Zheng, *ACS Appl. Mater. Interfaces*, 2021, **13**, 8507-8517.
- [5] Y. Wang, Y.N. Miao, S. Li, L.J. Gao and G.M. Xiao, *Mol. Catal.*, 2017, **436**, 128-137.
- [6] P. Weerachawanasak, P. Krawmanee, W. Inkamhaeng, F.J.C.S. Aires, T. Sooknoi and J. Panpranot, *Catal. Commun.*, 2021, **149**, 106221.
- [7] M.M. Villaverde, N.M. Bertero, T.F. Garetto and A.J. Marchi, *Catal. Today*, 2013, **213**, 87-92.
- [8] J. Wu, G. Gao, J. L. Li, P. Sun, X.D. Long and F. W. Li, *Appl. Catal. B-Environ.*, 2017, **203**, 227-236.
- [9] P. Jia, X. C. Lan, X. D. Li and T.F. Wang, *ACS Sustainable Chem. Eng.*, 2018, **6**, 13287-13295.
